# Supplementary material for: Up-conversion luminescence lifetime thermometry based on the1G4state of Tm3+modulated by cross relaxation processes
Source: Royal Society of Chemistry journal article supplement (doi:10.1039/c9dt03452h), 2019-01-01
Supplement: c9dt03452h2.pdf [file c9dt03452h2.pdf]

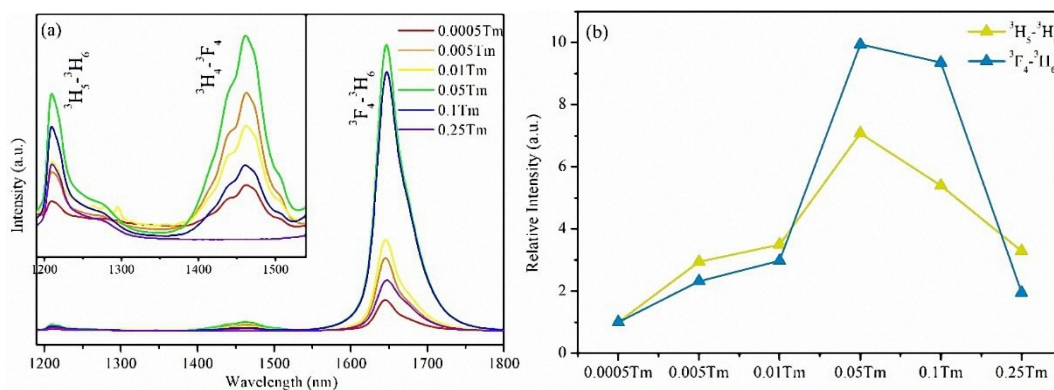

Fig. S1. (a) NIR emission spectra of the  $\beta$ -PbF<sub>2</sub>: Tm<sup>3+</sup>/Yb<sup>3+</sup> GCs under the same 976 nm laser excitation at the room temperature (293 K). (b) The relative integral intensity normalized at 0.0005Tm of different NIR emissions dependent on the Tm<sup>3+</sup> doping concentration.

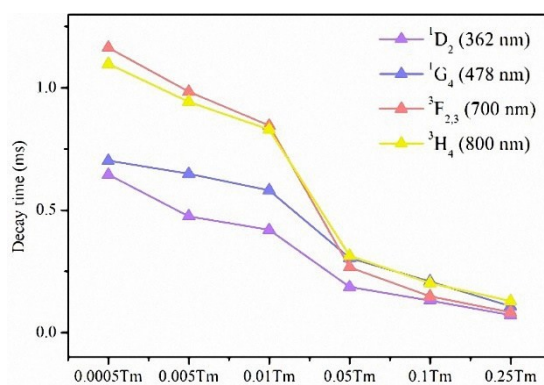

Fig. S2. Lifetimes of the different excited state transitions in  $\beta$ -PbF<sub>2</sub>: Tm<sup>3+</sup>/Yb<sup>3+</sup> GCs with variable Tm<sup>3+</sup> concentration measured at room temperature (293 K).

**Table S1** Values of the fitting parameters by Equation 1 for the measured data of  ${}^1\text{G}_4$  state lifetimes of 0.0005Tm, 0.01Tm, and 0.05Tm samples

| Sample   | $\tau_0$ (ms) | C     | $E_0$ (cm <sup>-1</sup> ) |
|----------|---------------|-------|---------------------------|
| 0.0005Tm | 0.83          | 4.86  | 744.83                    |
| 0.01Tm   | 0.63          | 14.74 | 1039.97                   |
| 0.05Tm   | 0.35          | 72.98 | 1415.31                   |
